# Supplementary material for: Structural and Functional Characterization of Rv0792c from Mycobacterium tuberculosis: Identifying Small Molecule Inhibitor against HutC Protein
Source: PubMed Central journal article supplement (PMC9927256; doi:10.1128/spectrum.01973-22), 2022-12-12
Supplement: spectrum.01973-22-s0002.pdf [file spectrum.01973-22-s0002.pdf]

## Supplementary Information

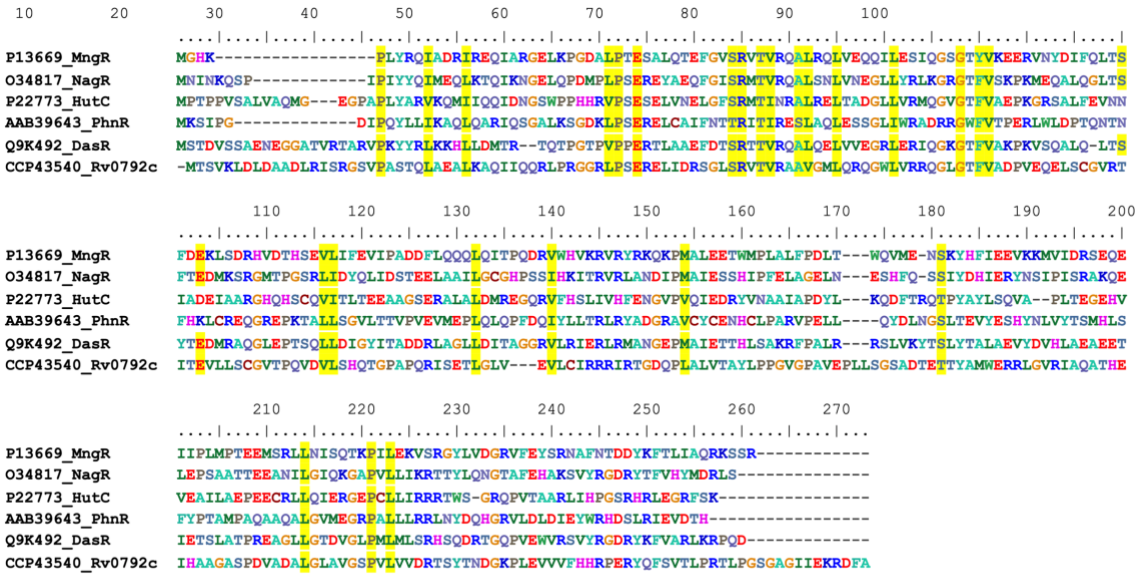

Chauhan et al., Figure S1

**Figure S1:** Multiple sequence alignment of putative Rv0792c homologs from various bacterial pathogens. Multiple sequence alignments among different proteins were prepared using Clustal W and formatted using BioEdit sequence alignment editor. The conserved residues among different proteins are highlighted in red. The proteins used in alignment are; CCP43540 (Rv0792c, *M. tuberculosis*), P13669 (MngR, *E. coli*), O34817 (NagR, *B. subtilis*), P22773 (HutC, *P. putida*), AAB39463 (PhnR, *S. enterica*) and Q9K492 (DasR, *S. coelicolor*).

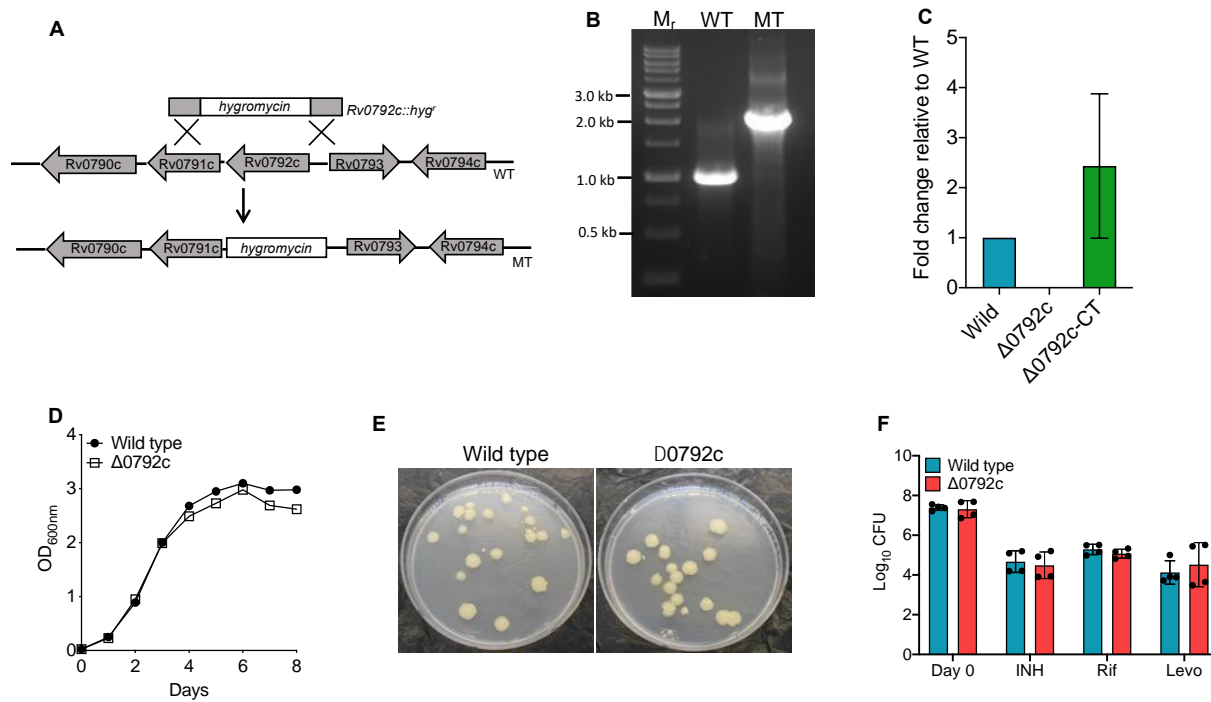

Chauhan et al., Figure S2

**Figure S2: (A) Schematic representation of Rv0792c locus in wild type and mutant strain of *M. tuberculosis*.** The gene for Rv0792c was replaced with the hygromycin resistance cassette in the mutant strain by homologous recombination using temperature sensitive mycobacteriophages **(B-F) Characterization of Rv0792c mutant strain of *M. tuberculosis*.** The disruption of Rv0792c in the mutant strain was confirmed by PCR (B) and qPCR analysis (C) using gene locus specific primers. (D) The growth kinetics of wild type and Rv0792c mutant strain was compared by measuring the absorbance at 600nm. (E) The colony morphology of wild type vs mutant strain is shown in this panel. The data shown in panel D and E is representative of two independent experiments. (F) For *in vitro* drug susceptibility assays, mid-log phase cultures of various strains were exposed to various TB drugs for 14 days. The data shown in this panel is mean  $\pm$  S.D. of results obtained from two independent experiments performed in duplicates.



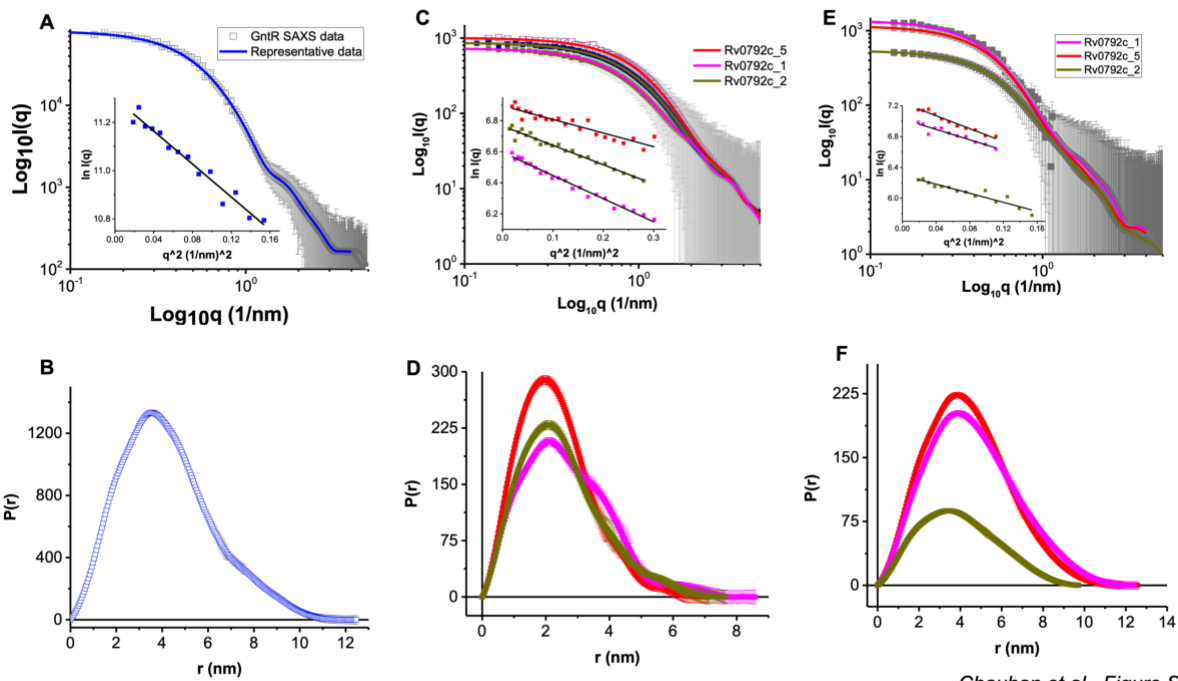

*Chauhan et al., Figure S4*

**Figure S4:** The panel (A) shows SAXS data acquired from a sample of Rv0792c at concentration close to 3.2 mg/ml (grey square symbols). Inset shows the linear region of the SAXS dataset in Guinier analysis considering globular scattering profile. (B) This panel shows the distance distribution profile of the interatomic vectors inside SAXS profile of the protein, and the blue line in the left panel plot shows the SAXS profile of the estimate. (C-F) Same analyses of the unliganded aptamers (C, D) and 1:1 molar mixture of protein and aptamers (E, F) are shown, respectively.

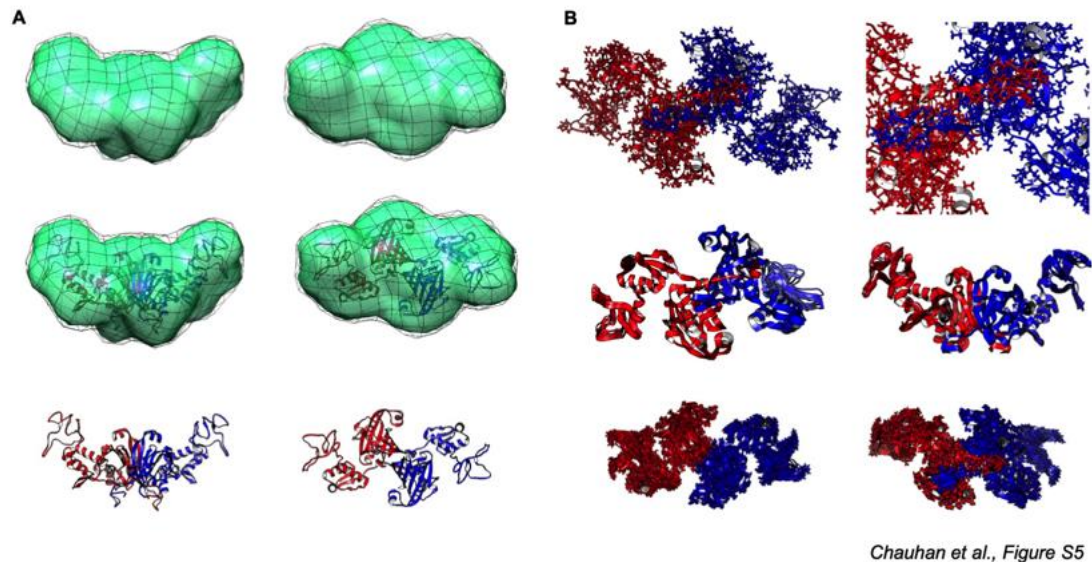

**Figure S5:** (A) Two orthogonal views compare the SAXS data based scattering envelope shape of Rv0792c and its structure solved by a combination of homology modelling and energy minimization. The green map represents the shape profile which was calculated to be common in ten dummy residue models of the protein. The variation is depicted as black mesh. The bottom panels show rotated views of the residue detail model of protein which was found to be a dimer and is shown in ribbon format. The central panel shows the inertial axes overlay of the two models indicating their similarity in three-dimensional space. (B) The calculated low frequency normal modes of motion accessible to the model of the Rv0792c dimer. Upper two panels highlight how the C-terminal tail of one chain latches on to the other to stabilize dimeric association. Lower four panels show calculated collective motion in the protein structure which shows motion in the N-termini of the protein chains in the dimer.

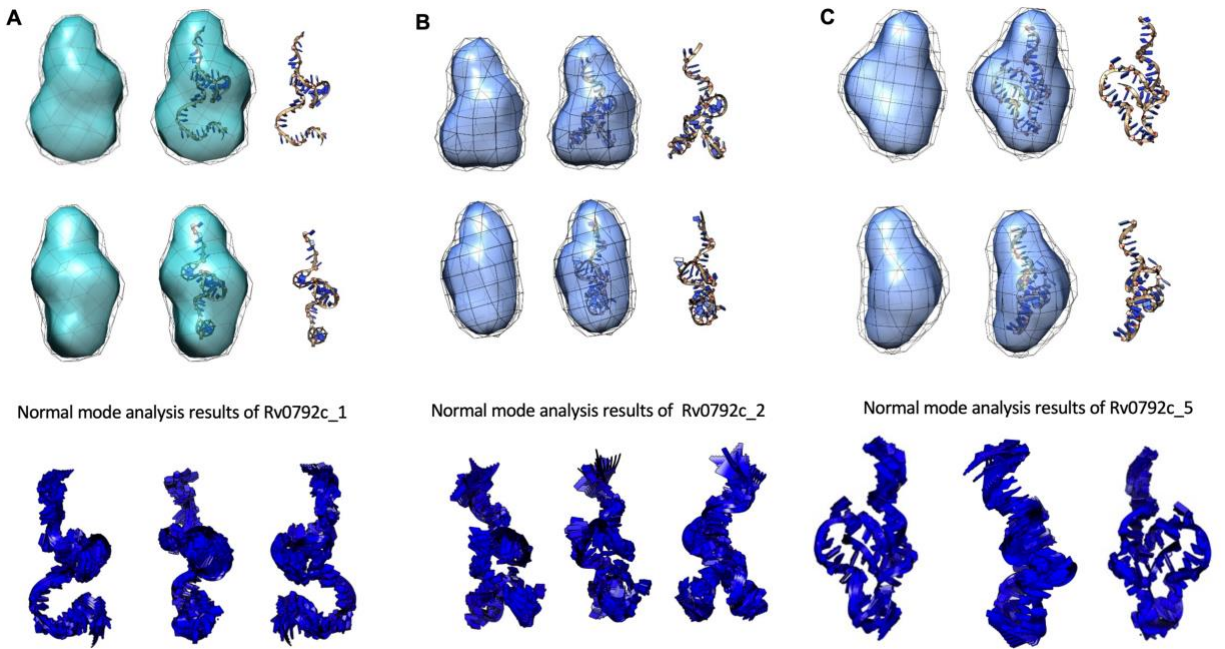

*Chauhan et al., Figure S6*

**Figure S6:** The SAXS based shapes of the three ssDNA aptamers have been shown here. The maps indicate the shape common to ten independent dummy residue solutions and black mesh represents the variation in them. The right panels show the low energy conformation of aptamer which best resembled the shape profile obtained experimentally in their SAXS profiles. All aptamers are monomer in solution. Normal mode analysis of the residue detail models of the aptamers have been done to perceive the extent of inherent motion accessible to the model of aptamers which also explains to some extent the additional volume seen in the molecular map of scattering shape of aptamers.

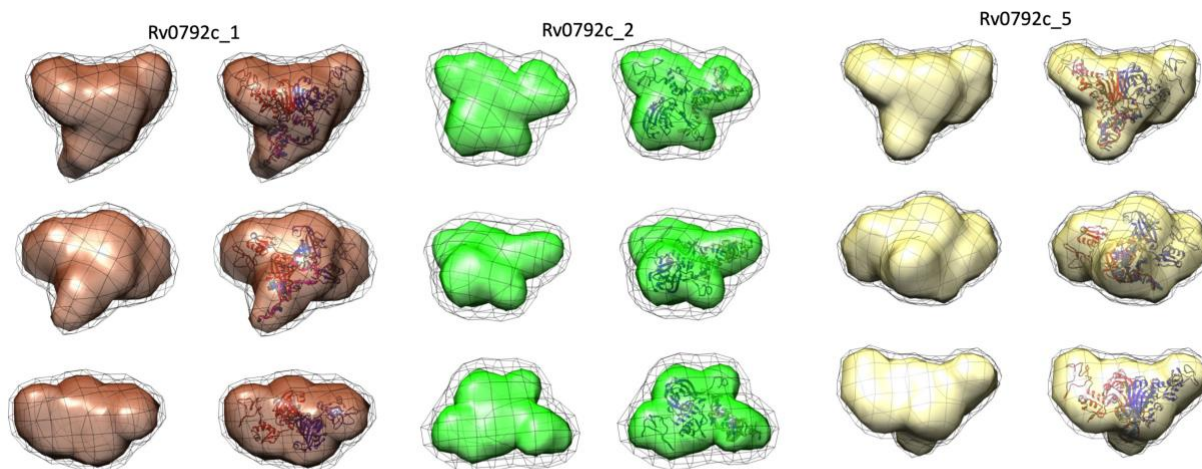

*Chauhan et al., Figure S7*

**Figure S7:** The SAXS based envelope shapes and residue scale models of the three ssDNA aptamers bound with Rv0792c protein have been shown here. The maps indicate the shape common to ten independent dummy residue solutions and black mesh represents the variation in them. The left column of images for the three sets shows the envelope of the complexes. The right column has the residue detailed model of the protein and aptamer where the latter was docked on protein and its pose was selected based on agreement with experimental SAXS data profile. The residue detail model was superimposed on the SAXS data based envelope in automated manner by aligning their inertial axes.

**Table S1: List of strains, plasmids and primers used in the study.**

| <b>Strains</b>           | <b>Description</b>                                                                                                                                                                                                                                                                   | <b>Source</b>                   |
|--------------------------|--------------------------------------------------------------------------------------------------------------------------------------------------------------------------------------------------------------------------------------------------------------------------------------|---------------------------------|
| H <sub>37</sub> Rv       | Laboratory strain (ATCC 27294) of <i>M. tuberculosis</i>                                                                                                                                                                                                                             | ATCC                            |
| Δ0792c strain            | Rv0792c mutant strain of <i>M. tuberculosis</i>                                                                                                                                                                                                                                      | This work                       |
| Δ0792c-CT strain         | Rv0792c mutant <i>M. tuberculosis</i> strain complemented with Rv0792c                                                                                                                                                                                                               | This work                       |
| BL21-CodonPLUS (DE3)     | F <sup>-</sup> <i>ompT hsdS</i> (r <sub>B</sub> <sup>-</sup> m <sub>B</sub> <sup>-</sup> ) <i>dcm</i> <sup>+</sup> Tet <sup>r</sup> <i>gal</i> λ(DE3) <i>endA</i> Hte [ <i>argU ileY</i> BB <i>leuW</i> Cam <sup>r</sup> ]                                                           | Stratagene, USA                 |
| <i>E. coli</i> HB101     | F <sup>-</sup> , <i>thi-1</i> , <i>hsdS20</i> (r <sub>B</sub> <sup>-</sup> m <sub>B</sub> <sup>-</sup> ), <i>supE44</i> , <i>recA13</i> , <i>ara-14</i> , <i>leuB6</i> , <i>proA2</i> , <i>lacY1</i> , <i>galK2</i> , <i>rpsL20</i> (str <sup>r</sup> ), <i>xyl-5</i> , <i>mtl-1</i> | Promega, UK                     |
| <i>E. coli</i> XL-1 blue | <i>recA1</i> , <i>endA1</i> , <i>gyrA96</i> , <i>thi-1</i> , <i>hsdR17</i> , <i>supE44</i> , <i>relA1</i> , <i>lac</i> [F <sup>+</sup> <i>proAB</i> , <i>lacI</i> <sup>Δ</sup> Δ <i>M15</i> Tn10 (Tet <sup>r</sup> )]                                                                | Stratagene, USA                 |
| <i>E. coli</i> DH5α      | F <sup>-</sup> φ80 <i>lacZ</i> Δ <i>M15</i> Δ( <i>lacZYAargF</i> ) <i>U169</i> <i>recA1</i> <i>endA1</i> <i>hsdR17</i> (r <sub>K</sub> <sup>-</sup> , m <sub>K</sub> <sup>+</sup> ) <i>phoA</i> <i>supE44</i> λ <sup>-</sup> <i>thi-1</i> <i>gyrA96</i> <i>relA1</i>                 | Thermo Fischer, Scientific, USA |
| <b>Plasmids</b>          | <b>Description</b>                                                                                                                                                                                                                                                                   | <b>Source</b>                   |
| pGEM-T easy              | T/A cloning vector, <i>amp</i> <sup>r</sup>                                                                                                                                                                                                                                          | Promega, UK                     |
| pTZ57 R/T                | T/A cloning vector, <i>amp</i> <sup>r</sup>                                                                                                                                                                                                                                          | Thermo Fischer Scientific, USA  |
| pYUB854                  | Cloning vector, <i>hyg</i> <sup>r</sup>                                                                                                                                                                                                                                              | Bardarov <i>et al.</i> , 2002   |
| pYUB854Δ0792c            | pYUB854 vector containing upstream and downstream regions of Rv0792c, <i>hyg</i> <sup>r</sup>                                                                                                                                                                                        | This work                       |
| pYUB159                  | Phagemid DNA, <i>amp</i> <sup>r</sup> , temperature sensitive mycobacteriophage                                                                                                                                                                                                      | Bardarov <i>et al.</i> , 2002   |
| pYUB159-Δ0792c           | Phagemid DNA containing upstream and downstream region of Rv0792c, <i>hyg</i> <sup>r</sup>                                                                                                                                                                                           | This work                       |
| pMV306K                  | <i>E. coli</i> mycobacterium shuttle vector, <i>kan</i> <sup>r</sup>                                                                                                                                                                                                                 | Stover <i>et al.</i> , 1991     |
| pMV306K-0792c            | pMV306K carrying Rv0792c along with its upstream region                                                                                                                                                                                                                              | This work                       |
| pET28b                   | <i>E. coli</i> T7 based expression system, <i>kan</i> <sup>r</sup>                                                                                                                                                                                                                   | Novagen                         |
| pET28b-0792c WT          | pET28b carrying Rv0792c coding region                                                                                                                                                                                                                                                | This work                       |
| pET28b-0792c R49A        | pET28b carrying Rv0792c with Arg49-Ala mutation                                                                                                                                                                                                                                      | This work                       |
| pET28b-0792c G80D        | pET28b carrying Rv0792c with Gly80-Asp mutation                                                                                                                                                                                                                                      | This work                       |
| pET28b-0792c R41A        | pET28b carrying Rv0792c with Arg41-Ala mutation                                                                                                                                                                                                                                      | This work                       |
| pET28b-0792c P40A        | pET28b carrying Rv0792c with Pro40-Ala mutation                                                                                                                                                                                                                                      | This work                       |



| <b>Primers name</b>  | <b>Forward (5'----- 3')</b>      | <b>Reverse (5' ----- 3')</b>                 |
|----------------------|----------------------------------|----------------------------------------------|
| Rv0792c_up           | GAGGCCTCGCACAGGCTGGTCACCGGATC    | GTCTAGAAGCGTCCAGGTCCAGCTTGACAG               |
| Rv0792c_dn           | GAAGCTTCGAGATTTTCGCATGAACGCCAAAG | GACTAGTCAGCAGCGTGACCGACAGTCGC                |
| Rv0792c_ORF          | GGGATCCGATGACATCTGTCAAGCTGGACCT  | GAAGCTTTCATGCGAAATCTCGTTTCTCGATA             |
| Rv0792c_R49A         | TTGCCCAGCGAAGCAGAATTGATCGAC      | GTCGATCAATTCTGCTTCGCTGGGCAA                  |
| Rv0792c_G80D         | GTGCGCCGGCAAGACTTGGGTACCTC       | GAAGGTACCCAAGTCTTGCCGGCGCAC                  |
| Rv0792c_R41A         | CAGCAGCGGCTGCCGGCCGGCGGGCGC      | GCGCCCGCCGGCCGGCAGCCGCTGCTG                  |
| Rv0792c_P40A         | CAGCAGCGGCTGGCGCGCGGGCGGC        | GCGCCCGCCGGCGGCCAGCCGCTGCTG                  |
| Rv0792c complemented | GTCTAGAGCTGGTATAGCCAACCCGCCGCCG  | GAAGCTTTCATGCGAAATCTCGTTTCTCGATA             |
| Rv0792c_SYBR         | GTGCGCCGGCAAGGCTTGGGTAC          | GCGCCGGCGAATACAGAGGACC                       |
| Rv0792c promoter_Cy5 | GTCTAGAGCTGGTATAGCCAACCCGCCGCCG  | <u>GGATATC</u> AAGACGTATTAACGCTTATACTCACCACG |

**Table S2a:**

Details of instrumentation, programs used for SAXS processing and SAXS data based parameters of unliganded protein Rv0792c, aptamers found to bind the protein and their molar mixtures are tabulated below.

---

|                                       |                                                  |
|---------------------------------------|--------------------------------------------------|
| <b>Instrument</b>                     | <b>SAXSpace (Anton Paar, Austria)</b>            |
| Collimation                           | Line Collimation                                 |
| Source                                | X-rays, CuK $\alpha$ , 0.15414 nm                |
| Detector                              | 1D Mythen                                        |
| Sample to detector distance           | 317.06 mm                                        |
| Exposure time & Repeats               | Average of three 60 minutes for samples & buffer |
| Subtraction from Solutions            | Matched Buffer                                   |
| <b>Programs</b>                       |                                                  |
| Data collection & Optics Control      | SAXSDrive                                        |
| Beam Position Correction              | SAXSTreat                                        |
| Buffer Subtraction & Desmearing       | SAXSQuant                                        |
| SAXS Intensity File Analysis          | ATSAS Suite of Programs v 2.8.4                  |
| <b>Programs for Shape Restoration</b> |                                                  |
| Guinier Analysis                      | SAXS Data Analysis                               |
| Distance Distribution Function        | SAXS Data Analysis                               |
| Shape Restoration                     | DAMMIF (10 independent runs, no symmetry bias)   |
| Averaging                             | DAMAVER                                          |
| Refinement of average                 | DAMMIN                                           |
| Superimposition                       | SUPCOMB [Plugins for PyMol v 1.1]                |
| Theoretical SAXS Comparison           | CRY SOL                                          |
| <b>Model Image Generation</b>         |                                                  |
| Software                              | UCSF CHIMERA v 1.14                              |

---

**Table S2b****SAXS Data Analysis and Shape Reconstruction Related Parameters**

| <i>Sample</i>                     | <i>Guinier Analysis</i><br>R <sub>g</sub> (nm) | <i>Distance Distribution Function</i><br>D <sub>max</sub> (nm) | <i>R<sub>g</sub>(nm)</i> | <i>NSD (Models)</i> | <i>χ<sup>2</sup> to residue model</i> |
|-----------------------------------|------------------------------------------------|----------------------------------------------------------------|--------------------------|---------------------|---------------------------------------|
| <u><i>Unliganded Protein</i></u>  |                                                |                                                                |                          |                     |                                       |
| GntR                              | 3.30                                           | 12.5                                                           | 3.31                     | 0.93±0.2 (10)       | 1.3                                   |
| <u><i>Unliganded Aptamers</i></u> |                                                |                                                                |                          |                     |                                       |
| Rv0792c_5                         | 1.81                                           | 7.1                                                            | 1.84                     | 0.549±0.02 (10)     | 1.2                                   |
| Rv0792c_1                         | 2.10                                           | 8.6                                                            | 2.23                     | 0.727±0.03 (10)     | 1.7                                   |
| Rv0792c_2                         | 1.92                                           | 7.6                                                            | 2.01                     | 0.684±0.02 (10)     | 1.5                                   |
| <u><i>1:1 molar mixtures</i></u>  |                                                |                                                                |                          |                     |                                       |
| P+ Rv0792c_5                      | 3.33                                           | 12.5                                                           | 3.40                     | 0.92±0.1 (10)       | 1.7                                   |
| P+ Rv0792c_1                      | 3.52                                           | 12.4                                                           | 3.55                     | 0.84±0.2 (10)       | 1.8                                   |
| P+ Rv0792c_2                      | 3.10                                           | 9.8                                                            | 3.08                     | 0.78±0.1 (10)       | 1                                     |

**Table S4::** Web-based tool MEME-Motif discovery predicted motifs among aptamer sequences

| Motif                                                                               | E-value  | % Occurrence | Sites                                                                                                                                                                                                                                                                                   |
|-------------------------------------------------------------------------------------|----------|--------------|-----------------------------------------------------------------------------------------------------------------------------------------------------------------------------------------------------------------------------------------------------------------------------------------|
|    | 2.5e+000 | 29.41        | Rv0729c_2 AGTCATTTCGT <b>CATAATCCC</b> ATCTGTTTCT<br>Rv0729c_3 TCGGGTGCT <b>CGTAATCAC</b> TTGAATGAGT<br>Rv0729c_14 GGTCTTATTG <b>CGTACTCCC</b> GGTTCCA<br>Rv0729c_1 CTCTACATCC <b>GGTAATCCG</b> CACATGAGTA<br>Rv0729c_7 ACAGTTCCTC <b>GAGAATACC</b> ACTGACTATT                          |
|    | 4.8e+001 | 35.29        | Rv0729c_8 TTGGATGGGT <b>CGGATGGGGG</b><br>Rv0729c_13 TCG <b>GGGATGGGGG</b> GGGATGTTCT<br>Rv0729c_5 TAGGGTCT <b>CGGATCGGAG</b> GGATGGGCAG<br>Rv0729c_11 TAG <b>GGGATGGAGG</b> GTAATGTGGT<br>Rv0729c_1 GCATGCACTG <b>GGGCTGGGAG</b> CGCGGATGTT<br>Rv0729c_12TGATGGGTC <b>CGGAAGGGGT</b> G |
|    | 2.1e+002 | 17.64        | Rv0729c_16 TTTTTTCTGG <b>ACATTTTC</b> GTGGGCCTT<br>Rv0729c_4 GGTTTTCAAT <b>ACATTTTC</b> GATNCCCG<br>Rv0729c_7 TCGTTG <b>ACAGTTC</b> CTCGAGAATA                                                                                                                                          |
|   | 4.8e+002 | 17.64        | Rv0729c_4 T <b>CGACCTCC</b> TTTNTCTCTA<br>Rv0729c_1 GTATTCATCT <b>CTACATCC</b> GGTAATCCGC<br>Rv0729c_2 CCATCTGTTT <b>CTTCCTCC</b> TTCCGT                                                                                                                                                |
|  | 8.2e+002 | 23.52        | Rv0729c_12 T <b>AGGGGG</b> AGGAGCGGGT<br>Rv0729c_10 T <b>AGGGGG</b> TGGTGCATGC<br>Rv0729c_8 T <b>AGGGGG</b> GTTCCTTTCA<br>Rv0729c_6 GATGTGGTAG <b>AGGGGG</b> GTGGGGTTCT                                                                                                                 |
|  | 1.1e+003 | 11.76        | Rv0729c_3 TAATCACTG <b>AATGAG</b> TTTATTGTGT<br>Rv0729c_1 GTAATCCGCA <b>CATGAG</b> TAATCC                                                                                                                                                                                               |
|  | 1.4e+003 | 11.76        | Rv0729c_15 TCGTC <b>GTTCCA</b> TCGTAAATTA<br>Rv0729c_14 CGTACTCCCG <b>GTTCCA</b>                                                                                                                                                                                                        |
|  | 1.5e+003 | 11.76        | Rv0729c_17 TTTGCCGGTT <b>AATATCGC</b><br>Rv0729c_7 AATACCACTG <b>ACTATTGC</b> AGCACCG                                                                                                                                                                                                   |

|                                                                                   |          |       |                                                                        |
|-----------------------------------------------------------------------------------|----------|-------|------------------------------------------------------------------------|
|  | 1.5e+003 | 11.76 | Rv0729c_7 GACTATTGCA GCACCG<br>Rv0729c_10 GGTGGTGCAT GCACTG GGGCTGGGAG |
|-----------------------------------------------------------------------------------|----------|-------|------------------------------------------------------------------------|
